# Supplementary material for: Photoacid catalyzed organic–inorganic hybrid inks for the manufacturing of inkjet-printed photonic devices
Source: Royal Society of Chemistry journal article supplement (doi:10.1039/c7tc05178f), 2018-01-01
Supplement: c7tc05178f1.pdf [file c7tc05178f1.pdf]

## SUPPLEMENTARY INFORMATION

### Photoacid catalyzed organic-inorganic hybrid inks for the manufacturing of Inkjet-Printed Photonic Devices

*Jorge Alamán,<sup>a, b</sup> María López-Valdeolivas,<sup>a</sup> Raquel Alicante,<sup>a</sup> Francisco J. Medel,<sup>c</sup> Jorge Silva-Treviño,<sup>a</sup> Jose Ignacio Peña,<sup>d</sup> and Carlos Sánchez-Somolinos,<sup>a, e, \*</sup>*

<sup>a</sup>Instituto de Ciencia de Materiales de Aragón (ICMA), CSIC-Universidad de Zaragoza,  
Departamento de Física de la Materia Condensada, Zaragoza, Spain

<sup>b</sup>BSH Electrodomésticos España, S.A., Polígono Industrial de PLA-ZA, Ronda del Canal  
Imperial de Aragón, 18-20, 50197 Zaragoza, Spain

<sup>c</sup>Instituto de Ciencia de Materiales de Aragón (ICMA), CSIC-Universidad de Zaragoza,  
Departamento de Ingeniería Mecánica, Zaragoza, Spain

<sup>d</sup>Instituto de Ciencia de Materiales de Aragón (ICMA), CSIC-Universidad de Zaragoza,  
Departamento de Ciencia y Tecnología de Materiales y Fluidos, Zaragoza, Spain

<sup>e</sup>CIBER in Bioengineering, Biomaterials and Nanomedicine (CIBER-BBN), Spain

\*Correspondence: carlos.s@csic.es

## Supplementary figures

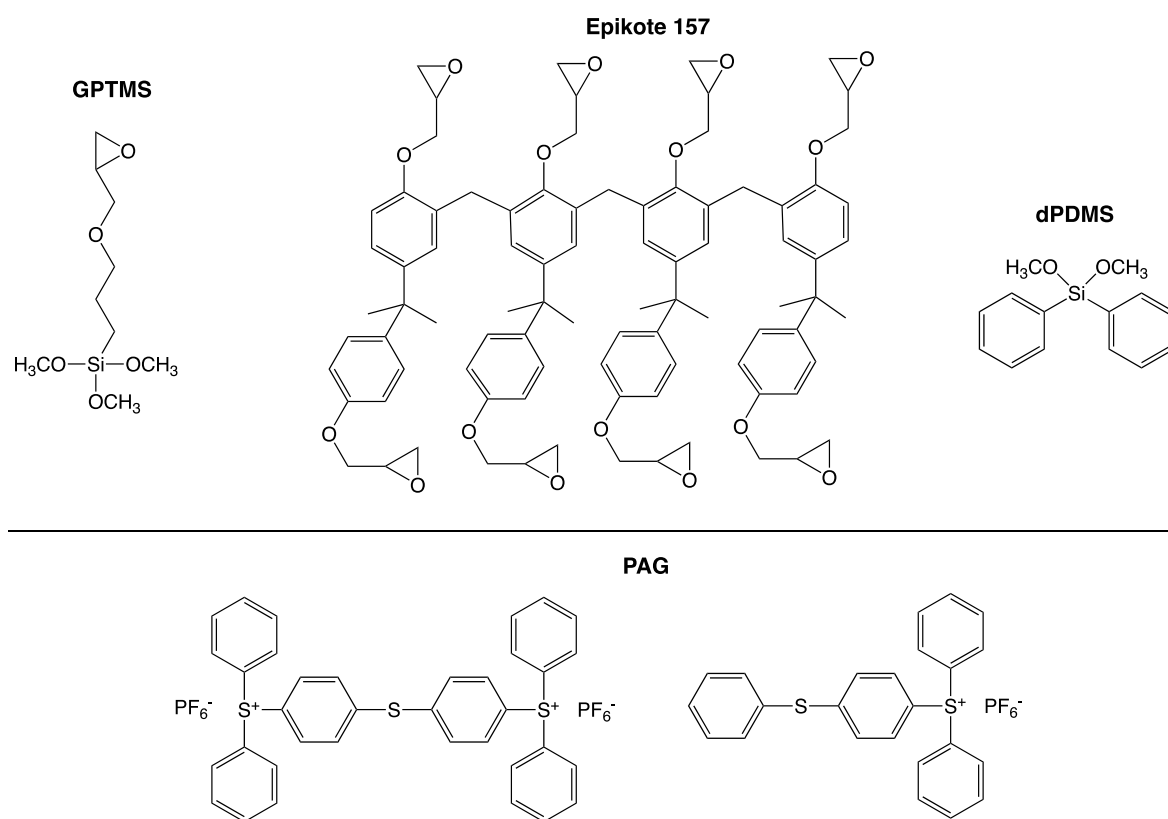

**Scheme S1** Chemical structure of the main components of the inks. GPTMS (3-glycidoxypropyltrimethoxysilane), Epikote 157, dPDMS (Dimethoxydiphenylsilane) and PAG (triarylsulfonium hexafluorophosphate salts, 50% in propylene carbonate).

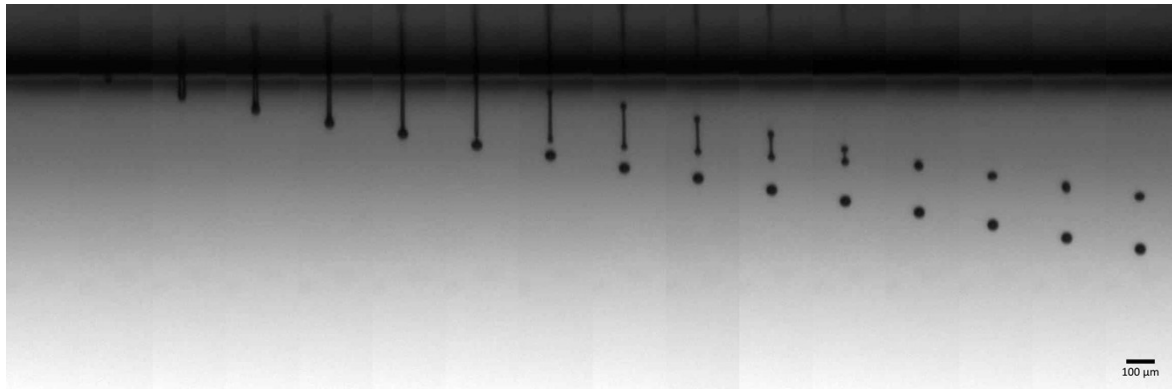

**Fig. S1** Sequence of photographs (from left to right) showing the drop formation process for the Model ink under overvoltage conditions. Application of higher voltage to the printhead led to a longer jet that ends up breaking up in a main droplet travelling at higher speed and one or several satellites following the first one. The time interval between two adjacent frames is 11  $\mu$ s (scale bar: 100  $\mu$ m).

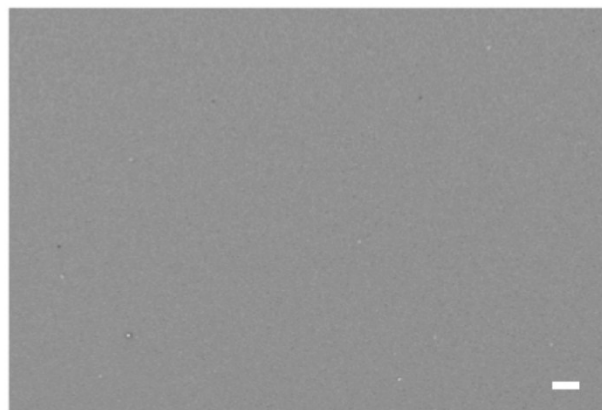

**Fig. S2** SEM morphology of 3.5  $\mu$ m thick cured film of Model ink (scale bar: 2  $\mu$ m).

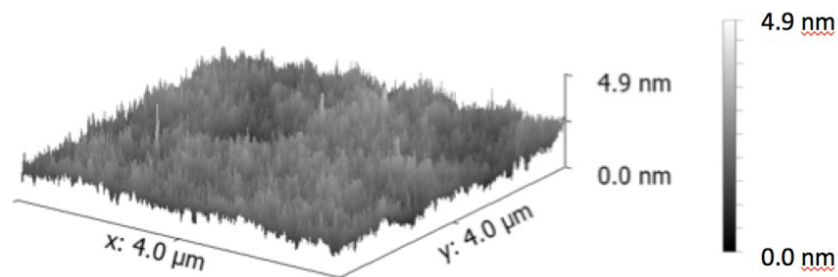

**Fig. S3** AFM topography of a cured Model ink deposit (3.5  $\mu$ m thick film).

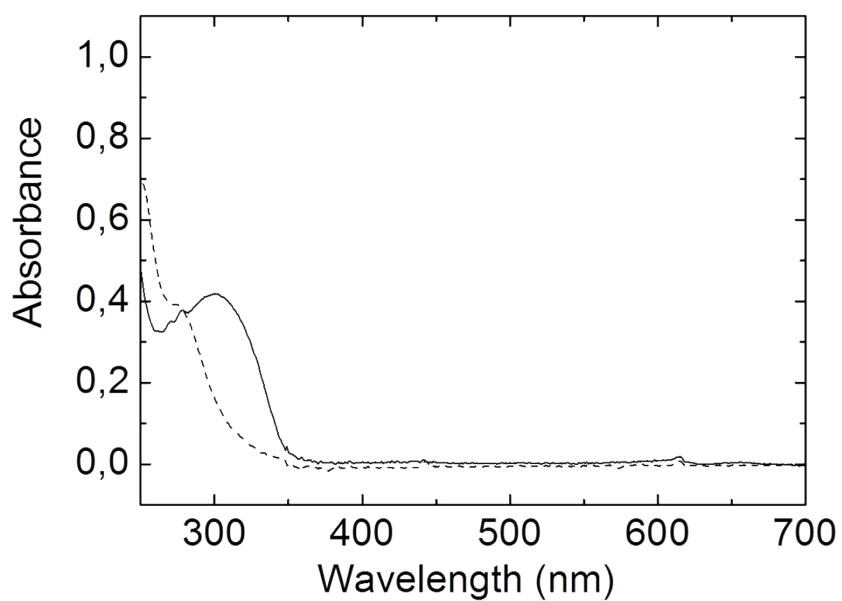

**Fig. S4** UV-Vis absorption spectrum of thin films of the Model ink placed between quartz glass plates (10  $\mu\text{m}$  gap) before (continuous line) and after UV irradiation (dashed line).

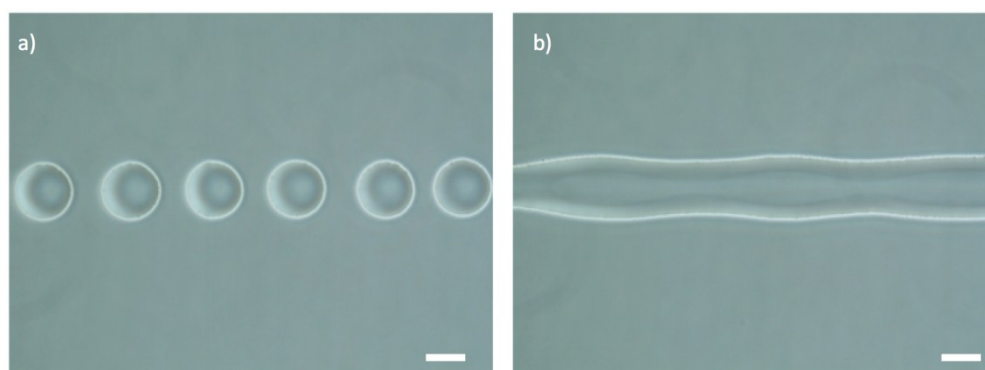

**Fig. S5** Phase contrast microscope images of the inkjet printed drops of Model ink deposited along a line in ozone treated substrates at different dpi (scale bar: 100  $\mu\text{m}$ ): (a) 120 dpi and (b) 300 dpi. Bulging appears in this last case.

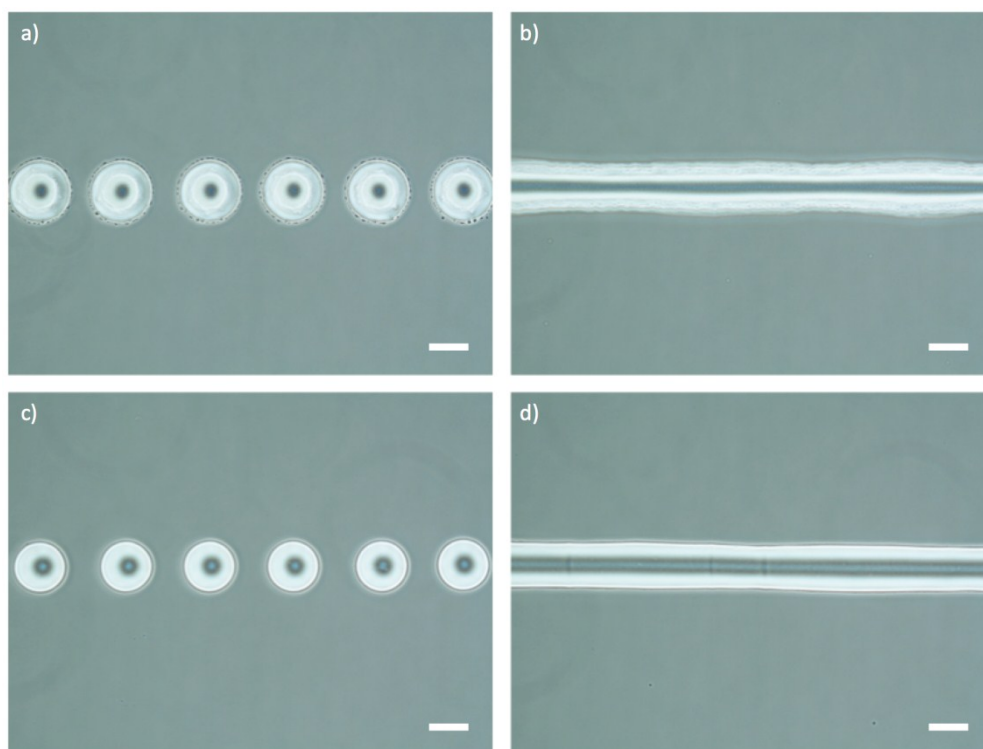

**Fig. S6** Phase contrast images of inkjet printed drops of HRI ink deposited along a line in ozone treated substrates cured (a and b) in ambient atmospheric conditions and (c and d) under mild vacuum (100 mBar) (scale bar: 100  $\mu\text{m}$ ).

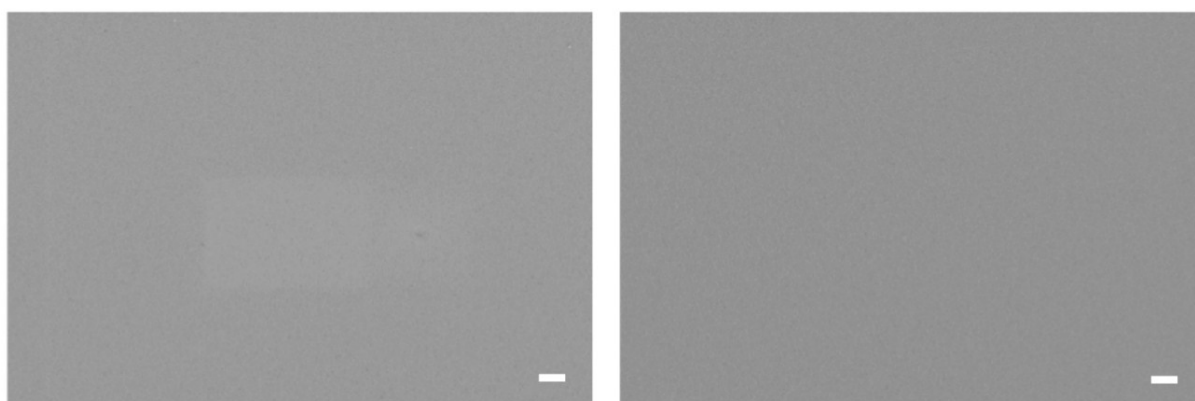

**Fig S7** SEM morphology of 4  $\mu\text{m}$  thick films of HRI ink cured (a) in ambient atmosphere conditions and (b) under mild vacuum (100 mBar) (scale bar: 2  $\mu\text{m}$ ).

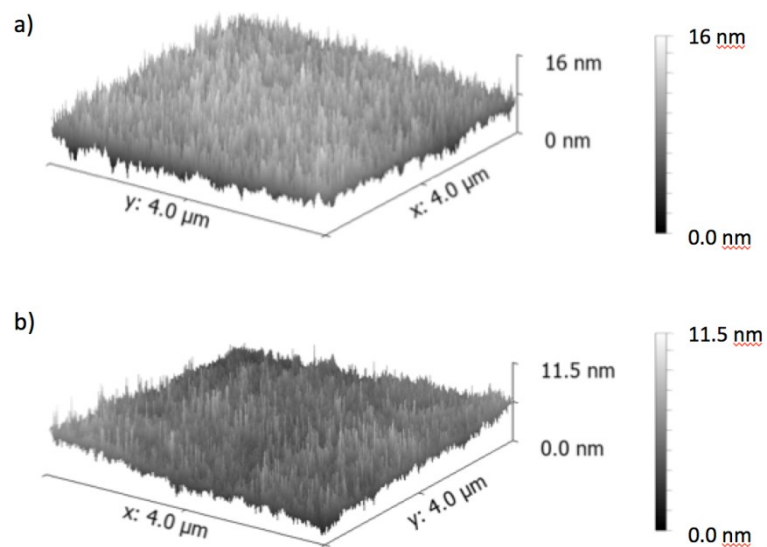

**Fig. S8** AFM topography of HRI ink deposits (16 μm thick film) exposed (a) in ambient atmospheric conditions and (b) under mild vacuum.

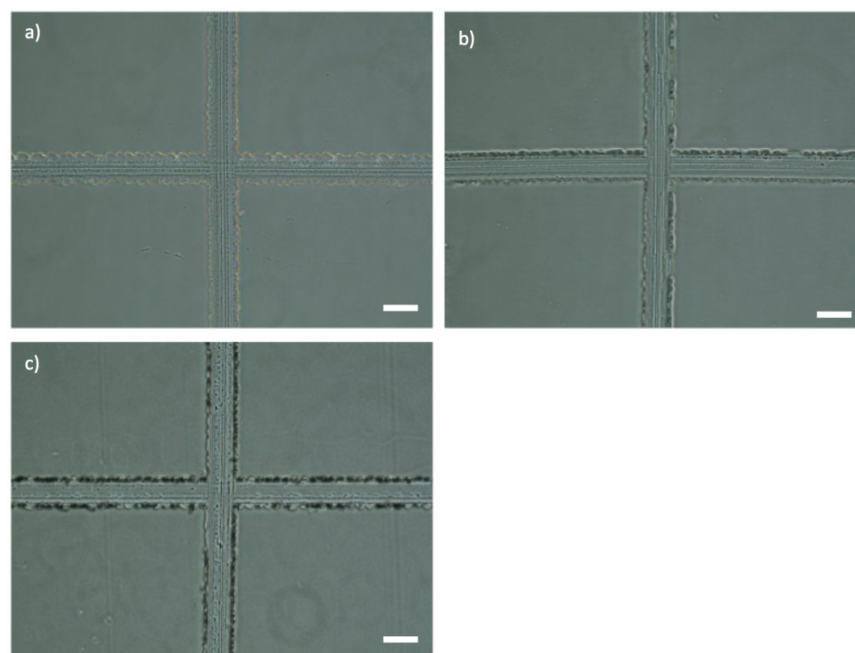

**Fig. S9** Optical microscope images of cross-cut areas after the ASTM 3359 adhesion test for thin cured films deposited by inkjet. (a) Model ink film (thickness: 3.5 μm) and (b and c) HRI ink film (thickness: 4 μm) cured (b) in atmosphere and (c) under mild vacuum conditions.

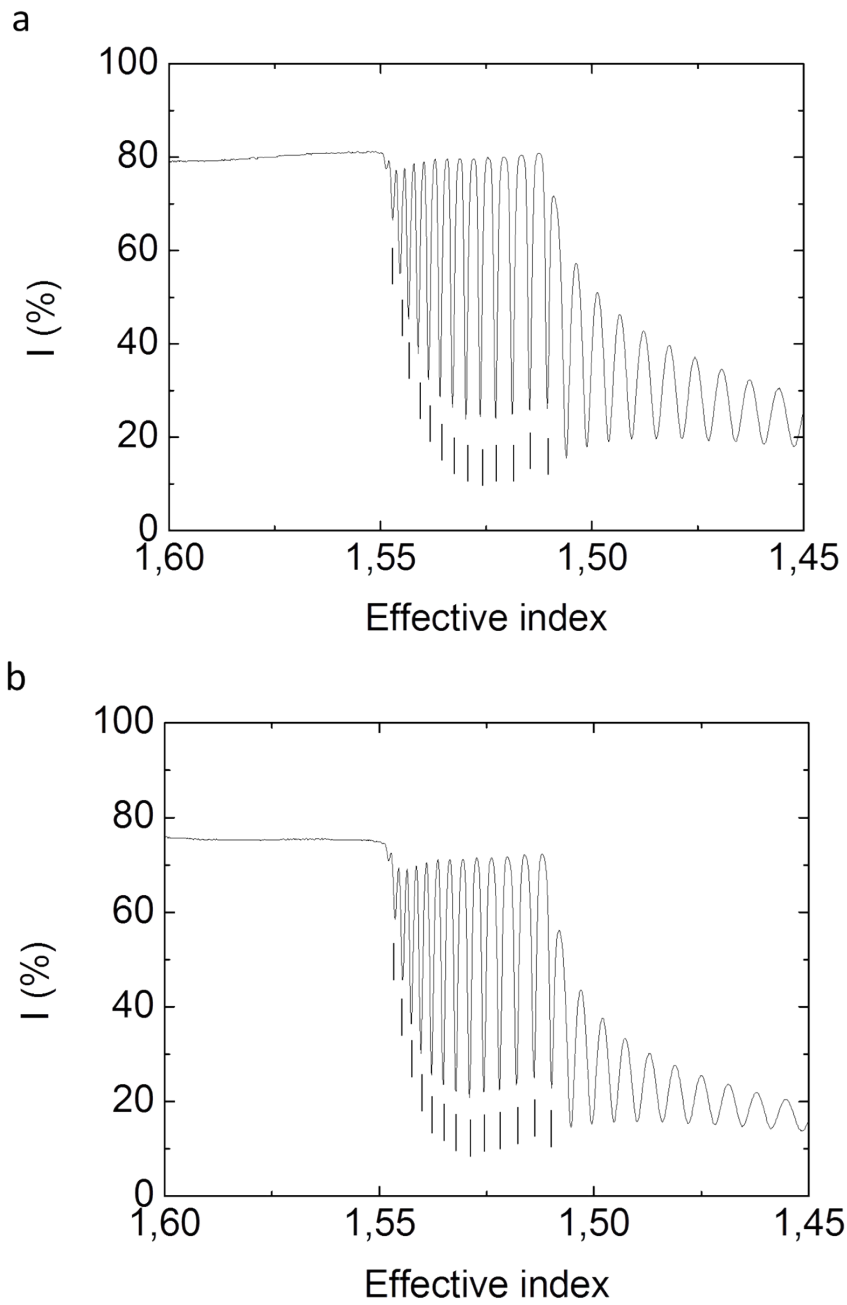

**Fig. S10** (a) TE and (b) TM propagation modes (at 632.8 nm) for a HRI ink deposit (16 microns thick film) cured under mild vacuum conditions. Modes with effective refractive index higher than that of the substrate ( $n_g = 1.514$ ), and fully supported by the inkjet printed film are indicated with a line.

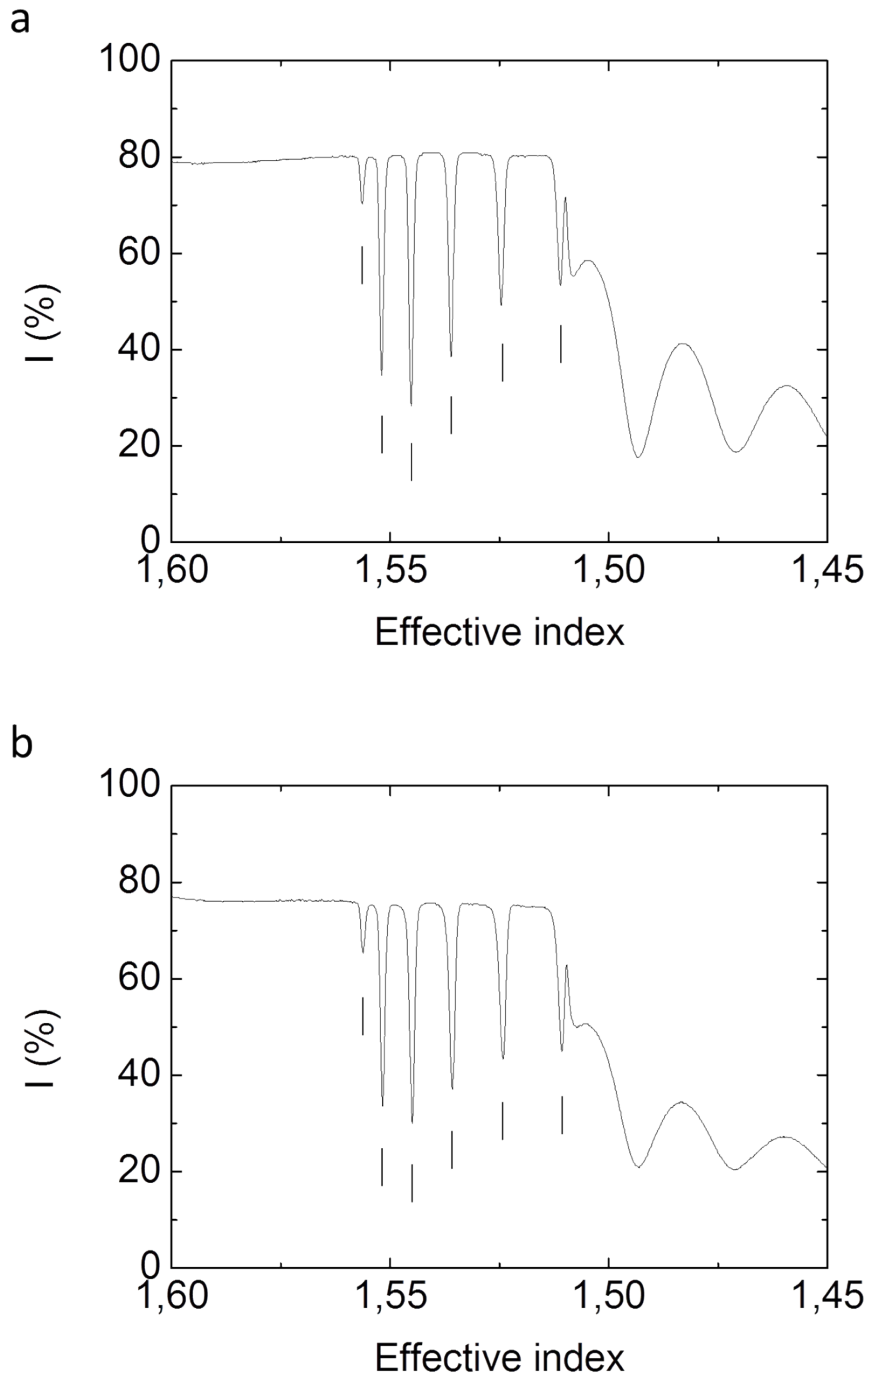

**Fig. S11** (a) TE and (b) TM propagation modes (at 632.8 nm) for a HRI ink deposit cured in ambient atmosphere (4.4  $\mu\text{m}$  thick film). Modes with effective refractive index higher than that of the substrate ( $n_g = 1.514$ ), and fully supported by the inkjet printed film are indicated with a line.



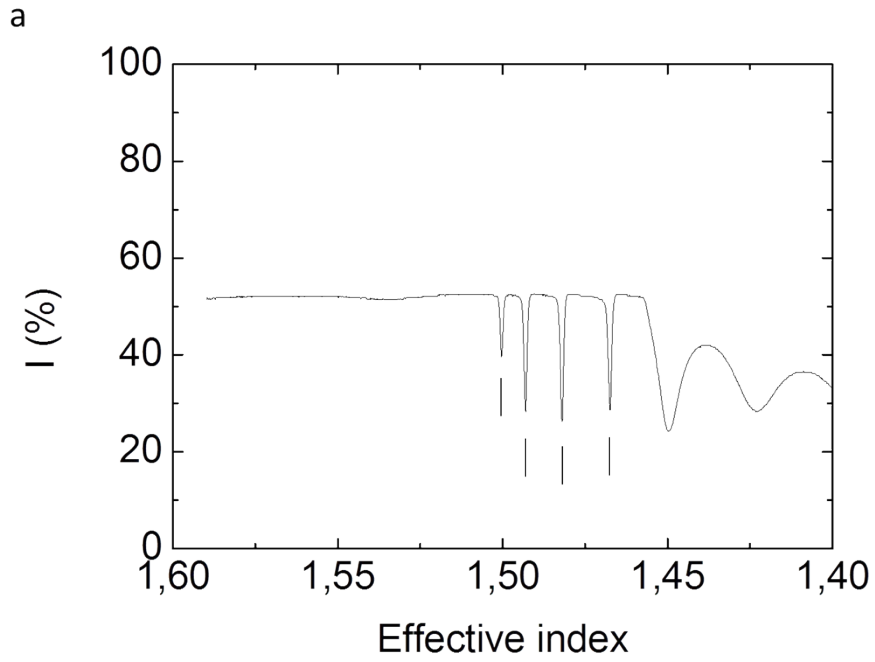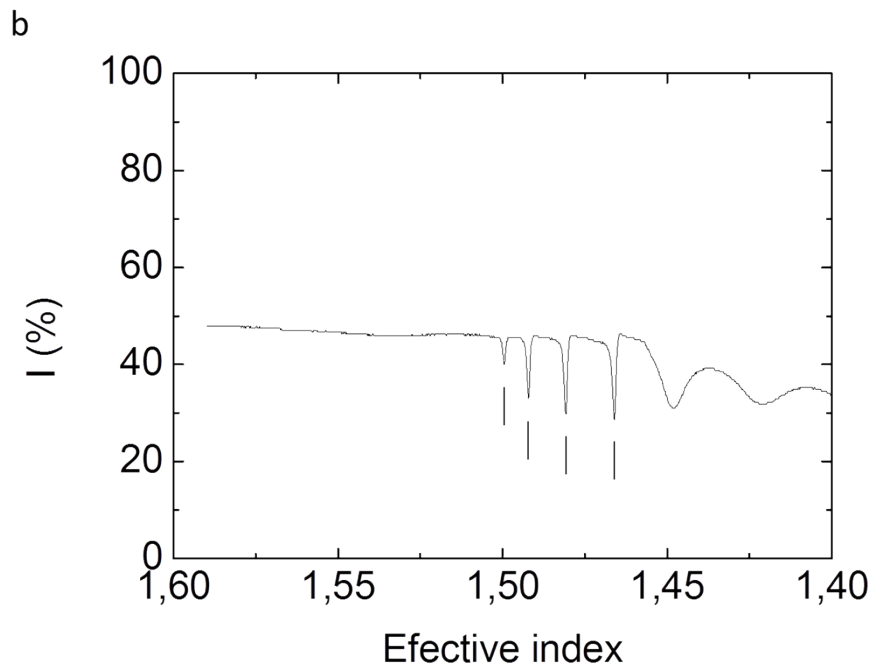

**Fig. S12** (a) TE and (b) TM propagation modes (at 632.8 nm) for a Model ink deposit (3.4  $\mu\text{m}$  thick film). Modes with effective refractive index higher than that of the substrate ( $n_q = 1.457$ ), and fully supported by the inkjet printed film are indicated with a line.
